# Supplementary material for: Two Genetic Variations in the IRF8 region are associated with Behçet’s disease in Han Chinese
Source: PubMed Central journal article supplement (PMC4726413; doi:10.1038/srep19651), 2016-01-22
Supplement: srep19651-s1.pdf [file srep19651-s1.pdf]

**Two Genetic Variations in the IRF8 region are associated with Behçet's disease in  
Han Chinese**

Yanni Jiang<sup>1\*</sup>, Hong Wang<sup>2\*</sup>, Hongsong Yu<sup>1</sup>, Lin Li<sup>1</sup>, Dengfeng Xu<sup>1</sup>, Shengping Hou<sup>1</sup>,  
Aize Kijlstra<sup>3</sup>, Peizeng Yang<sup>1</sup>

<sup>1</sup>The First Affiliated Hospital of Chongqing Medical University, Chongqing Key  
Laboratory of Ophthalmology and Chongqing Eye Institute, Chongqing, P R China.

<sup>2</sup>Beijing Tongren Eye Center, Beijing Key Laboratory of Ophthalmology and Visual  
Science, Beijing Tongren Hospital, Capital Medical University, Beijing, P R China.

<sup>3</sup> University Eye Clinic Maastricht, Maastricht, The Netherlands.

\*These authors contributed equally to this work

Correspondence to: Professor Peizeng Yang, MD, PhD.

The First Affiliated Hospital of Chongqing Medical University, Chongqing Key  
Laboratory of Ophthalmology and Chongqing Eye Institute, Chongqing, P. R. China,  
400016;

Phone: +8623 89012851;

FAX: +8623 89012851;

Email: [peizengycmu@126.com](mailto:peizengycmu@126.com)

**Supplementary Figure 1**

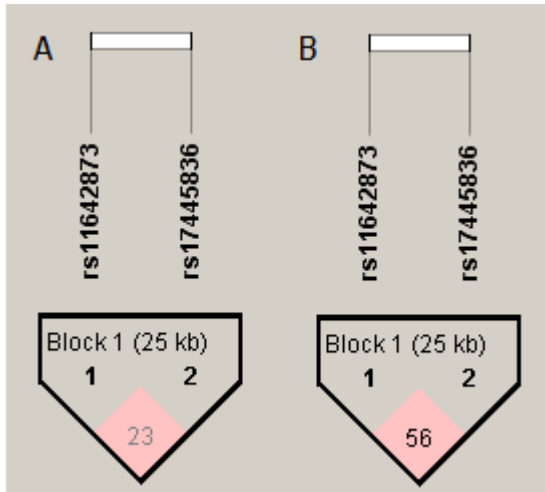

**Supplementary Figure 2**

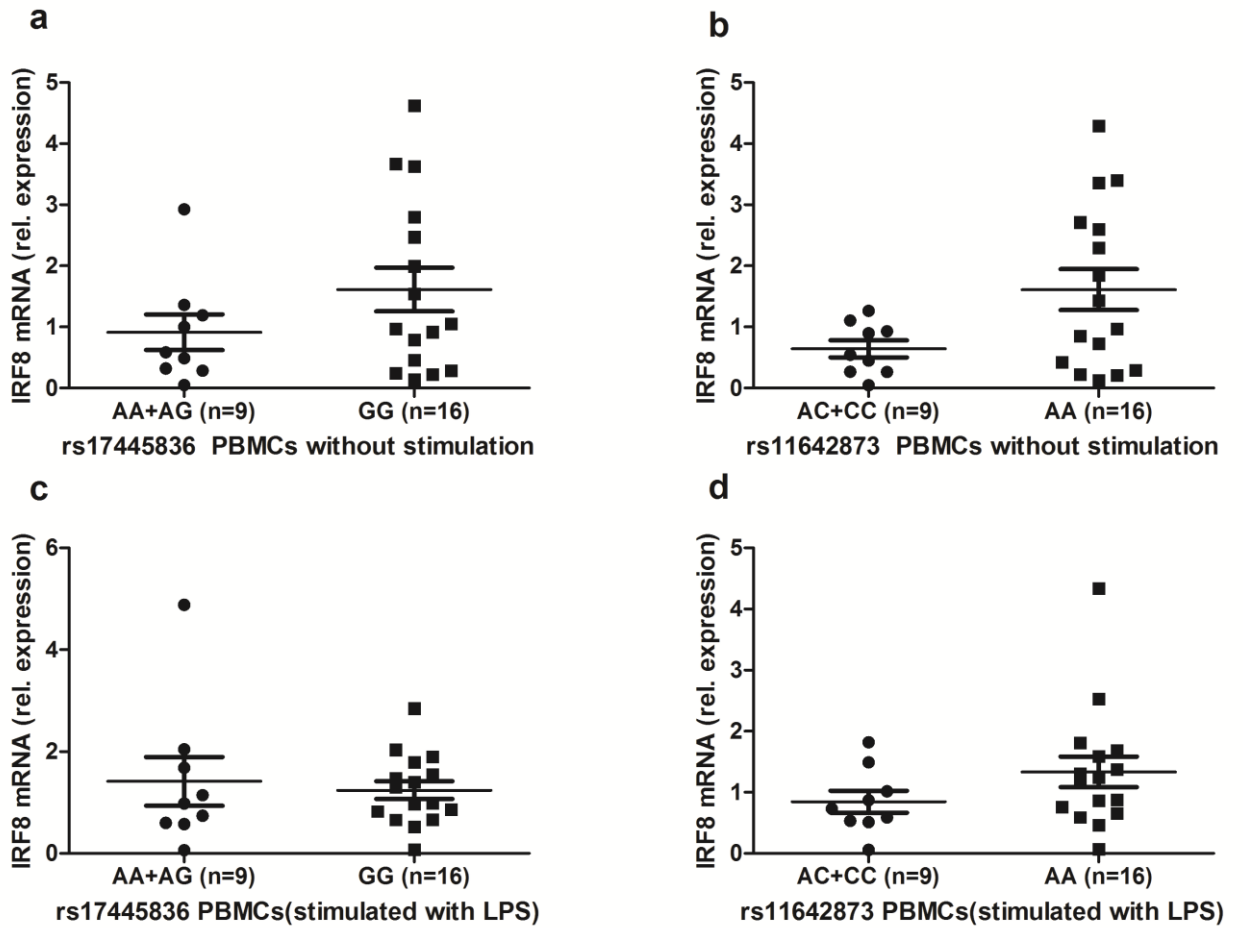

**Supplementary Figure Legends**

**Supplementary Figure 1.** Linkage disequilibrium (LD) of rs11642873 and rs17445836 performed by Haploview4.2 software in BD patients and normal controls enrolled in present study. (A): LD measure of  $r^2=0.23$ ; and (B): LD

measure of  $D'=0.56$ .

**Supplementary Figure 2. The influence of rs17445836 and rs11642873 on the relative expression of IRF8.** The expression of IRF8 in unstimulated PBMCs obtained from genotyped healthy individuals with diverse genotypes of rs17445836 (a) and rs11642873 (b). The expression of IRF8 in PBMCs following LPS stimulation comparing the various genotypes of rs17445836 (c) and rs11642873 (d). The mRNA expression of IRF8 was not significantly different between genotypes ( $P_c > 0.05$ ). Data are shown as mean  $\pm$ SD.  $P_c$ : Bonferroni corrected p value, multiplied by 3.

Supplementary Table 1. Primers and restriction enzymes utilized for RFLP analysis of IRF3, IRF7, IRF8, MYD88, P50 and TRIM20 gene polymorphisms.

| Gene   | SNPs ID    | Primers                                                       | Restriction enzymes | Length of the target segments (bp) |
|--------|------------|---------------------------------------------------------------|---------------------|------------------------------------|
| IRF3   | rs2304204  | 5'CAATTTGCATGTGACGCTCCC3'<br>5'TCTTCCGCGTTACCTACGATG3'        | PvuI*               | 294bp(146+148)                     |
| IRF7   | rs1061501  | 5'GTCGCTTCGTGATGCCGCG3'<br>5'ATGTTCCCTTTGCCAAGC3'             | SacII*              | 147bp(18+129)                      |
| IRF8   | rs11644034 | 5'AGCCACCTTCTATCATGCC3'<br>5'GGTCCCATGCACCTTAACCAC3'          | EcoO109I*           | 344bp(89+255)                      |
|        | rs925994   | 5'CCAAGCTACTCTTAAGGATGCCATTATT3'<br>5'GACTAAACCTCGTGCAGCCT3'  | HpyF10VI*           | 102bp(72+26)                       |
|        | rs11648084 | 5'GGCATTTCAGAACATTCGGTTGA3'<br>5'TGCACCTTAACCACAGTTGGCA3'     | HincII*             | 121bp(23+99)                       |
|        | rs2280381  | 5'TTGAAGGAACTAAAATTTGTCTGGGCTAC3'<br>5'CCAAGCATCTGTACCTGGCA3' | TaiI*               | 228bp(32+196)                      |
|        | rs11642873 | 5'CCGTTTCAGGTTACAGCAAGA3'<br>5'CTGGGTGATAATGAAGTGCCGTG3'      | BtgI**              | 172bp(24+148)                      |
|        | rs17445836 | 5'CCAGGTGGAAATGGAGGT3'<br>5' CAGGCACAGGGCTAAGAA3'             | PstI*               | 282bp(204+78)                      |
| MYD88  | rs7744     | 5'AATTGGGCACTCATCTATTCC3'<br>5'GTATAAATTGCTCTGGGAAGG3'        | Bfal*               | 193(90+103)                        |
| NF-κB1 | rs3774959  | 5'CTCCTTAACTGCTCCAGCCC3'<br>5'TGTTTTGTTTTTCATCTTCTGTGTCT3'    | BstMAI*             | 183(155+33)                        |
| TRIM20 | rs224204   | 5'GACCTGGGAGGGAGATGATCCCAA3'<br>5'GCACGGGACACAATGCACTC3'      | Bse8I*              | 227bp(206+21)                      |
|        | rs224217   | 5'ACCATCTTAGAATCCAAGGGTTTATGT3'<br>5'TGGGACCGCCTGTGTATCAT3'   | RsaI*               | 300bp(271+29)                      |
|        | rs224225   | 5'AGAATATTCCACACAAGAAAACGGCACATA3'<br>5'TGCGTTTGCTCAGGGGCTT3' | NdeI*               | 209bp(28+181)                      |

\* Fermentas China Co. Ltd., Shenzhen, China, \*\*New England Biolabs China Co. Ltd., Beijing, China.

Supplementary Table 2. Clinical features, age and gender distribution in investigated patients with BD and patients with VKH

| Extraocular findings   | Total           | %    |
|------------------------|-----------------|------|
| Patients with BD       | 1081            |      |
| Mean age $\pm$ SD      | 33.8 $\pm$ 9.1  |      |
| Male                   | 847             | 78.4 |
| Female                 | 233             | 21.6 |
| Uveitis                | 1081            | 100  |
| Oral ulcer             | 1081            | 100  |
| Skin lesions           | 844             | 78.1 |
| Genital ulcer          | 620             | 57.4 |
| Hypopyon               | 284             | 26.3 |
| Arthritis              | 206             | 19.1 |
| Positive pathergy test | 200             | 18.5 |
| Patients with VKH      | 384             |      |
| Mean age $\pm$ SD      | 33.5 $\pm$ 10.6 |      |
| Male                   | 201             | 52.3 |
| Female                 | 183             | 47.7 |
| Uveitis                | 384             | 100  |
| Tinnitus               | 165             | 43.0 |
| Alopecia               | 153             | 39.8 |
| Headache               | 144             | 37.5 |
| Gray hair              | 137             | 35.7 |
| Vitiligo               | 70              | 28.3 |
| Scalp allergy          | 61              | 15.9 |
| Nuchal rigidity        | 37              | 9.6  |
| Controls               | 2066            |      |
| Mean age $\pm$ SD      | 33.8 $\pm$ 8.1  |      |
| Male                   | 1077            | 52.1 |
| Female                 | 989             | 47.9 |

BD: Behçet's disease; VKH: Vogt–Koyanagi–Harada.

Supplementary Table 3. Frequencies of genotypes and alleles of IRF3, IRF7, IRF8, MYD88, P50 and TRIM20 polymorphisms in patients with BD and controls.

| Gene          | SNPs       | Genotype   | Case       | Control     | P value | Pc value           | OR(95%CI)          |
|---------------|------------|------------|------------|-------------|---------|--------------------|--------------------|
|               |            | Allele     | N(freq.)   | N(freq.)    |         |                    |                    |
| <b>IRF3</b>   | rs2304204  | A A        | 216(0.562) | 307(0.533)  | 0.368   | NS                 | 1.127(0.869-1.461) |
|               |            | A G        | 149(0.388) | 230(0.399)  | 0.726   | NS                 | 0.954(0.732-1.243) |
|               |            | G G        | 19(0.049)  | 39(0.068)   | 0.246   | NS                 | 0.717(0.408-1.260) |
|               |            | G          | 187(0.243) | 308(0.267)  | 0.241   | NS                 | 0.882(0.715-1.088) |
|               |            | A          | 581(0.757) | 844(0.733)  | 0.241   | NS                 | 1.134(0.919-1.399) |
| <b>IRF7</b>   | rs1061501  | A A        | 199(0.518) | 254(0.444)  | 0.024   | NS                 | 1.347(1.039-1.745) |
|               |            | A G        | 151(0.393) | 268(0.469)  | 0.021   | NS                 | 0.735(0.565-0.956) |
|               |            | G G        | 34(0.089)  | 50(0.087)   | 0.952   | NS                 | 1.014(0.643-1.600) |
|               |            | G          | 219(0.285) | 368(0.322)  | 0.09    | NS                 | 0.841(0.689-1.027) |
|               |            | A          | 549(0.715) | 776(0.678)  | 0.09    | NS                 | 1.189(0.973-1.452) |
| <b>IRF8</b>   | rs11644034 | AA         | 6(0.016)   | 4(0.007)    | 0.194   | NS                 | 2.270(0.636-8.097) |
|               |            | AG         | 76(0.198)  | 127(0.220)  | 0.401   | NS                 | 0.872(0.634-1.200) |
|               |            | GG         | 302(0.786) | 445(0.773)  | 0.612   | NS                 | 1.084(0.793-1.482) |
|               |            | G          | 680(0.885) | 1017(0.883) | 0.861   | NS                 | 1.026(0.771-1.365) |
|               |            | A          | 88(0.115)  | 135(0.117)  | 0.861   | NS                 | 0.975(0.733-1.297) |
|               | rs925994   | T T        | 21(0.055)  | 14(0.024)   | 0.014   | NS                 | 2.322(1.166-4.625) |
|               |            | G T        | 116(0.302) | 183(0.318)  | 0.609   | NS                 | 0.930(0.703-1.229) |
|               |            | G G        | 247(0.643) | 379(0.658)  | 0.638   | NS                 | 0.937(0.715-1.228) |
|               |            | G          | 610(0.794) | 941(0.817)  | 0.219   | NS                 | 0.866(0.688-1.090) |
|               |            | T          | 158(0.206) | 211(0.183)  | 0.219   | NS                 | 1.155(0.918-1.454) |
|               | rs11648084 | C C        | 131(0.346) | 148(0.258)  | 0.004   | NS                 | 1.520(1.146-2.017) |
|               |            | C T        | 163(0.430) | 304(0.530)  | 0.003   | NS                 | 0.670(0.516-0.870) |
|               |            | T T        | 85(0.224)  | 122(0.213)  | 0.667   | NS                 | 1.071(0.783-1.465) |
|               |            | C          | 425(0.561) | 600(0.523)  | 0.103   | NS                 | 1.166(0.969-1.402) |
|               |            | T          | 333(0.439) | 548(0.477)  | 0.103   | NS                 | 0.858(0.713-1.032) |
| rs2280381     | A A        | 301(0.784) | 424(0.736) | 0.092       | NS      | 1.300(0.598-1.765) |                    |
|               | A G        | 78(0.203)  | 144(0.250) | 0.092       | NS      | 0.765(0.560-1.045) |                    |
|               | G G        | 5(0.013)   | 8(0.014)   | 0.909       | NS      | 0.937(0.304-2.885) |                    |
|               | G          | 88(0.115)  | 160(0.139) | 0.12        | NS      | 0.802(0.608-1.059) |                    |
|               | A          | 680(0.885) | 992(0.861) | 0.12        | NS      | 1.246(0.944-1.645) |                    |
| <b>MYD88</b>  | rs7744     | A A        | 170(0.445) | 229(0.399)  | 0.157   | NS                 | 1.208(0.930-1.570) |
|               |            | A G        | 169(0.442) | 281(0.490)  | 0.153   | NS                 | 0.827(0.638-1.073) |
|               |            | G G        | 43(0.113)  | 64(0.111)   | 0.959   | NS                 | 1.011(0.671-1.523) |
|               |            | G          | 255(0.334) | 409(0.356)  | 0.311   | NS                 | 0.905(0.746-1.098) |
|               |            | A          | 509(0.666) | 739(0.644)  | 0.311   | NS                 | 1.105(0.911-1.340) |
| <b>NF-κB1</b> | rs3774959  | A A        | 72(0.188)  | 106(0.184)  | 0.892   | NS                 | 1.023(0.734-1.426) |
|               |            | A G        | 197(0.513) | 294(0.510)  | 0.937   | NS                 | 1.010(0.780-1.308) |
|               |            | G G        | 115(0.299) | 176(0.306)  | 0.841   | NS                 | 0.972(0.733-1.287) |
|               |            | G          | 427(0.556) | 646(0.561)  | 0.836   | NS                 | 0.981(0.816-1.179) |
|               |            | A          | 341(0.444) | 506(0.439)  | 0.836   | NS                 | 1.020(0.848-1.225) |

|               |          |          |            |            |            |       |                    |                    |
|---------------|----------|----------|------------|------------|------------|-------|--------------------|--------------------|
| <b>TRIM20</b> | rs224204 | C C      | 58(0.151)  | 101(0.175) | 0.321      | NS    | 0.837(0.588-1.190) |                    |
|               |          | C T      | 189(0.492) | 305(0.530) | 0.257      | NS    | 0.861(0.665-1.115) |                    |
|               |          | T T      | 137(0.357) | 170(0.295) | 0.045      | NS    | 1.325(1.006-1.744) |                    |
|               | C        | C        | 305(0.397) | 507(0.440) | 0.062      | NS    | 0.838(0.696-1.009) |                    |
|               |          | T        | 463(0.603) | 645(0.560) | 0.062      | NS    | 1.193(0.991-1.437) |                    |
|               |          | rs224217 | CC         | 244(0.635) | 404(0.701) | 0.033 | NS                 | 0.742(0.564-0.976) |
|               | CT       | CT       | 134(0.349) | 158(0.274) | 0.014      | NS    | 1.418(1.073-1.873) |                    |
|               |          | TT       | 6(0.016)   | 14(0.024)  | 0.356      | NS    | 0.637(0.243-1.673) |                    |
|               |          | C        | 622(0.810) | 966(0.839) | 0.104      | NS    | 0.820(0.646-1.042) |                    |
|               | T        | T        | 146(0.190) | 186(0.161) | 0.104      | NS    | 1.219(0.960-1.548) |                    |
|               |          | rs224225 | C C        | 4(0.010)   | 9(0.016)   | 0.494 | NS                 | 0.663(0.203-2.169) |
|               |          |          | C T        | 130(0.339) | 168(0.292) | 0.124 | NS                 | 1.243(0.942-1.640) |
|               | T T      |          | 250(0.651) | 399(0.693) | 0.177      | NS    | 0.828(0.629-1.089) |                    |
|               | C        | C        | 138(0.180) | 186(0.161) | 0.296      | NS    | 1.138(0.893-1.449) |                    |
|               |          | T        | 630(0.820) | 966(0.839) | 0.296      | NS    | 0.879(0.690-1.120) |                    |

Pc: Bonferroni corrected p value, multiplied by 39 /genotype and 13 /allele. NS: not significant.

Supplementary Table 4. Frequencies of genotypes and alleles of IRF3, IRF7, IRF8, MYD88, P50 and TRIM20 polymorphisms in patients with VKH and controls.

| Gene        | SNPs       | Genotype   | Case        | Control     | P value | Pc value           | OR(95%CI)          |
|-------------|------------|------------|-------------|-------------|---------|--------------------|--------------------|
|             |            | Allele     | N(freq.)    | N(freq.)    |         |                    |                    |
| <b>IRF3</b> | rs2304204  | A A        | 177(0.461)  | 307(0.533)  | 0.029   | NS                 | 0.749(0.578-0.971) |
|             |            | A G        | 171(0.445)  | 230(0.399)  | 0.157   | NS                 | 1.208(0.930-1.568) |
|             |            | G G        | 36(0.094)   | 39(0.068)   | 0.141   | NS                 | 1.424(0.888-2.285) |
|             |            | G          | 243(0.316)  | 308(0.267)  | 0.02    | NS                 | 1.268(1.038-1.550) |
|             |            | A          | 525(0.684)  | 844(0.733)  | 0.02    | NS                 | 0.788(0.645-0.963) |
| <b>IRF7</b> | rs1061501  | A A        | 185(0.482)  | 254(0.444)  | 0.251   | NS                 | 1.164(0.898-1.509) |
|             |            | A G        | 166(0.432)  | 268(0.469)  | 0.27    | NS                 | 0.864(0.666-1.121) |
|             |            | G G        | 33(0.086)   | 50(0.087)   | 0.937   | NS                 | 0.982(0.620-1.555) |
|             |            | G          | 232(0.302)  | 368(0.322)  | 0.365   | NS                 | 0.913(0.749-1.112) |
|             |            | A          | 536(0.698)  | 776(0.678)  | 0.365   | NS                 | 1.096(0.899-1.335) |
| <b>IRF8</b> | rs11644034 | AA         | 4(0.010)    | 4(0.007)    | 0.562   | NS                 | 1.505(0.374-6.055) |
|             |            | AG         | 76(0.198)   | 127(0.220)  | 0.401   | NS                 | 0.872(0.634-1.200) |
|             |            | GG         | 304(0.792)  | 445(0.773)  | 0.484   | NS                 | 1.119(0.817-1.531) |
|             |            | G          | 684(0.891)  | 1017(0.883) | 0.598   | NS                 | 1.081(0.810-1.443) |
|             |            | A          | 84(0.109)   | 135(0.117)  | 0.598   | NS                 | 0.925(0.693-1.235) |
|             | rs925994   | T T        | 9(0.023)    | 14(0.024)   | 0.931   | NS                 | 0.963(0.413-2.249) |
|             |            | G T        | 98(0.255)   | 183(0.318)  | 0.037   | NS                 | 0.736(0.551-0.982) |
|             |            | G G        | 277(0.721)  | 379(0.658)  | 0.039   | NS                 | 1.346(1.015-1.784) |
|             |            | G          | 652(0.849)  | 941(0.817)  | 0.067   | NS                 | 1.260(0.984-1.614) |
|             |            | T          | 116(0.151)  | 211(0.183)  | 0.067   | NS                 | 0.793(0.619-1.016) |
|             | rs11648084 | C C        | 128(0.337)  | 148(0.258)  | 0.008   | NS                 | 1.462(1.101-1.941) |
|             |            | C T        | 162(0.426)  | 304(0.530)  | 0.002   | NS                 | 0.660(0.508-0.857) |
|             |            | T T        | 90(0.237)   | 122(0.213)  | 0.377   | NS                 | 1.150(0.844-1.567) |
|             |            | C          | 418(0.550)  | 600(0.523)  | 0.241   | NS                 | 1.116(0.929-1.342) |
|             |            | T          | 342(0.450)  | 548(0.477)  | 0.241   | NS                 | 0.896(0.745-1.077) |
|             | rs2280381  | A A        | 287(0.747)  | 424(0.736)  | 0.696   | NS                 | 1.061(0.789-1.425) |
|             |            | A G        | 94(0.245)   | 144(0.250)  | 0.855   | NS                 | 0.972(0.721-1.312) |
|             |            | G G        | 3(0.008)    | 8(0.014)    | 0.386   | NS                 | 0.559(0.147-2.121) |
|             |            | G          | 100(0.130)  | 160(0.139)  | 0.586   | NS                 | 0.928(0.710-1.214) |
|             |            | A          | 668(0.870)  | 992(0.861)  | 0.586   | NS                 | 1.077(0.824-1.409) |
| rs11642873  | A A        | 302(0.805) | 433(0.758)  | 0.089       | NS      | 1.318(0.958-1.815) |                    |
|             | A C        | 73(0.195)  | 133(0.233)  | 0.163       | NS      | 0.796(0.578-1.097) |                    |
|             | C C        | 0          | 5(0.009)    | 0.069       | NS      | 1.009(1.001-1.017) |                    |
|             | A          | 677(0.903) | 999(0.875)  | 0.062       | NS      | 1.328(0.985-1.789) |                    |
|             | C          | 73(0.097)  | 143(0.125)  | 0.062       | NS      | 0.753(0.559-1.015) |                    |
| rs17445836  | A A        | 0          | 1(0.002)    | 0.414       | NS      | 1.002(0.998-1.005) |                    |
|             | A G        | 68(0.178)  | 85(0.151)   | 0.271       | NS      | 1.217(0.858-1.725) |                    |
|             | G G        | 315(0.822) | 478(0.848)  | 0.305       | NS      | 0.833(0.588-1.181) |                    |
|             | G          | 698(0.911) | 1041(0.923) | 0.364       | NS      | 0.858(0.616-1.195) |                    |
|             | A          | 68(0.089)  | 87(0.077)   | 0.364       | NS      | 1.166(0.837-1.624) |                    |



|               |           |     |            |            |       |    |                     |
|---------------|-----------|-----|------------|------------|-------|----|---------------------|
| <b>MYD88</b>  | rs7744    | A A | 146(0.382) | 229(0.399) | 0.603 | NS | 0.932(0.715-1.215)  |
|               |           | A G | 190(0.497) | 281(0.490) | 0.812 | NS | 1.032(0.979-1.337)  |
|               |           | G G | 46(0.120)  | 64(0.111)  | 0.672 | NS | 1.091(0.729-1.633)  |
|               |           | G   | 282(0.369) | 409(0.356) | 0.567 | NS | 1.057(0.874--1.279) |
|               |           | A   | 482(0.631) | 739(0.644) | 0.567 | NS | 0.946(0.782-1.144)  |
| <b>NF-κB1</b> | rs3774959 | A A | 62(0.161)  | 106(0.184) | 0.367 | NS | 0.854(0.605-1.204)  |
|               |           | A G | 189(0.492) | 294(0.510) | 0.58  | NS | 0.930(0.718-1.204)  |
|               |           | G G | 133(0.346) | 176(0.306) | 0.185 | NS | 1.204(0.915-1.585)  |
|               |           | G   | 455(0.592) | 646(0.561) | 0.169 | NS | 1.139(0.946-1.370)  |
|               |           | A   | 313(0.408) | 506(0.439) | 0.169 | NS | 0.878(0.730-1.057)  |
| <b>TRIM20</b> | rs224204  | C C | 70(0.182)  | 101(0.175) | 0.783 | NS | 1.048(0.749-1.468)  |
|               |           | C T | 196(0.510) | 305(0.530) | 0.562 | NS | 0.926(0.715-1.200)  |
|               |           | T T | 118(0.307) | 170(0.295) | 0.687 | NS | 1.059(0.800-1.403)  |
|               |           | C   | 336(0.438) | 507(0.440) | 0.91  | NS | 0.989(0.823-1.189)  |
|               |           | T   | 432(0.562) | 645(0.560) | 0.91  | NS | 1.011(0.841-1.215)  |
|               | rs224217  | CC  | 258(0.672) | 404(0.701) | 0.333 | NS | 0.872(0.660-1.151)  |
|               |           | CT  | 117(0.305) | 158(0.274) | 0.308 | NS | 1.159(0.873-1.540)  |
|               |           | TT  | 9(0.023)   | 14(0.024)  | 0.931 | NS | 0.963(0.413-2.249)  |
|               |           | C   | 633(0.824) | 966(0.839) | 0.41  | NS | 0.903(0.708-1.151)  |
|               |           | T   | 135(0.176) | 186(0.161) | 0.41  | NS | 1.108(0.868-1.413)  |
|               | rs224225  | C C | 2(0.005)   | 9(0.016)   | 0.137 | NS | 0.330(0.071-1.535)  |
|               |           | C T | 127(0.331) | 168(0.292) | 0.199 | NS | 1.200(0.909-1.585)  |
|               |           | T T | 255(0.664) | 399(0.693) | 0.351 | NS | 0.877(0.665-1.156)  |
|               |           | C   | 131(0.171) | 186(0.161) | 0.598 | NS | 1.068(0.836-1.364)  |
|               |           | T   | 637(0.829) | 966(0.839) | 0.598 | NS | 0.936(0.733-1.196)  |

Pc: Bonferroni corrected p value, multiplied by 39 /genotype and 13 /allele. NS: not significant.

Supplementary Table 5. Frequencies of genotypes and alleles of rs1800871/IL-10 and rs3021094/IL-10 polymorphisms of 25 unrelated genotyped healthy individuals in rs11642873.

| SNPs      | Genotype | AC+CC cases | AA cases  | P value | Pc value | OR(95%CI)           |
|-----------|----------|-------------|-----------|---------|----------|---------------------|
|           |          | N(freq.)    | N(freq.)  |         |          |                     |
| rs1800871 | C C      | 2(0.222)    | 2(0.125)  | 0.602   | NS       | 2.000(2.231-17.338) |
|           | C T      | 3(0.333)    | 4(0.250)  | 0.673   | NS       | 1.500(0.251-8.977)  |
|           | T T      | 4(0.444)    | 10(0.625) | 0.434   | NS       | 0.480(0.091-2.523)  |
|           | C        | 7(0.389)    | 8(0.250)  | 0.348   | NS       | 1.909(0.552-6.599)  |
|           | T        | 11(0.611)   | 24(0.750) | 0.348   | NS       | 0.524(0.152-1.811)  |
| rs3021094 | AA       | 2(0.222)    | 10(0.625) | 0.097   | NS       | 0.171(0.026-1.111)  |
|           | A C      | 4(0.444)    | 3(0.188)  | 0.205   | NS       | 3.467(0.563-21.350) |
|           | C C      | 3(0.333)    | 3(0.188)  | 0.630   | NS       | 2.167(0.334-14.057) |
|           | A        | 8(0.444)    | 23(0.719) | 0.073   | NS       | 0.313(0.094-1.047)  |
|           | C        | 10(0.556)   | 9(0.281)  | 0.073   | NS       | 3.194(0.955-10.686) |

Pc: Bonferroni corrected p value, multiplied by 6 /genotype and 2 /allele. NS: not significant.

Supplementary Table 6. Frequencies of genotypes and alleles of rs1800871/IL-10 and rs3021094/IL-10 polymorphisms of 25 unrelated genotyped healthy individuals in rs17445836.

| SNPs      | Genotype | AA+AG cases | GG cases  | P value | Pc value | OR(95%CI)           |
|-----------|----------|-------------|-----------|---------|----------|---------------------|
|           |          | N(freq.)    | N(freq.)  |         |          |                     |
| rs1800871 | C C      | 3(0.333)    | 3(0.188)  | 0.630   | NS       | 2.167(0.334-14.057) |
|           | C T      | 4(0.444)    | 5(0.313)  | 0.671   | NS       | 1.760(0.326-9.510)  |
|           | T T      | 2(0.222)    | 8(0.500)  | 0.229   | NS       | 0.286(0.045-1.821)  |
|           | C        | 10(0.556)   | 11(0.344) | 0.232   | NS       | 2.386(0.732-7.780)  |
|           | T        | 8(0.444)    | 21(0.656) | 0.232   | NS       | 0.419(0.129-1.366)  |
| rs3021094 | AA       | 3(0.333)    | 9(0.563)  | 0.411   | NS       | 0.389(0.071-2.133)  |
|           | A C      | 3(0.333)    | 3(0.188)  | 0.630   | NS       | 2.167(0.334-14.057) |
|           | C C      | 3(0.333)    | 4(0.250)  | 0.673   | NS       | 1.500(0.251-8.977)  |
|           | A        | 9(0.500)    | 21(0.656) | 0.370   | NS       | 0.524(0.161-1.700)  |
|           | C        | 9(0.500)    | 11(0.344) | 0.370   | NS       | 1.909(0.588-6.196)  |

Pc: Bonferroni corrected p value, multiplied by 6 /genotype and 2 /allele. NS: not significant.
